# Supplementary material for: The attractiveness of network meta-analysis: a comprehensive systematic and narrative review
Source: PubMed Central journal article supplement — Heart Lung Vessel. 2015;7(2):133–42. (PMC4476767), 2015

**Online supplemental material of the article:  
Greco, et al. The attractiveness of network meta-analysis: a comprehensive systematic and narrative review.**

**TABLE S1** - The list of the 92 articles excluded from the analysis.

| Author         | Year | Abbreviated journal name       |
|----------------|------|--------------------------------|
| Catalá-López F | 2014 | Rheumatol Int                  |
| Corbett MS     | 2014 | Osteoarthritis Cartilage       |
| Hutton B       | 2014 | Syst Rev                       |
| Jiang X        | 2014 | Biom J                         |
| Meijler WJ     | 2014 | J Pain Symptom Manage          |
| Ohlssen D      | 2014 | Pharm Stat                     |
| Pandis N       | 2014 | Am J Orthod Dentofacial Orthop |
| Tan SH         | 2014 | J Clin Epidemio                |
| Thorlund K     | 2014 | Cost Eff Resour Alloc          |
| Warren FC      | 2014 | Stat Med                       |
| Zeng C         | 2014 | Osteoarthritis Cartilage       |
| Zhang J        | 2014 | Clin Trials                    |
| Abramovici A   | 2013 | Evid Based Med                 |
| Achana FA      | 2013 | Stat Med                       |
| Amaral JF      | 2013 | Thyroid                        |
| Bonsu KO       | 2013 | Syst Rev                       |
| Busse JW       | 2013 | Syst Rev                       |
| Catalá-López F | 2013 | Osteoporos Int                 |
| Catalá-López F | 2013 | J Thorac Cardiovasc Surg       |
| Chaimani A     | 2013 | PLoS One                       |
| Cipriani A     | 2013 | Ann Intern Med                 |
| Cope S         | 2013 | BMC Med Res Methodol           |
| Dias S         | 2013 | Med Decis Making               |
| Donegan S      | 2013 | Stat Med                       |
| Freemantle N   | 2013 | Osteoporos Int                 |
| Greco T        | 2013 | Stat Methods Med Res           |
| Jansen JP      | 2013 | BMC Med                        |
| Jiann BP       | 2013 | Eur Urol                       |
| König J        | 2013 | Stat Med                       |
| Mavridis D     | 2013 | Stat Med                       |
| Messori A      | 2013 | Clin Infect Dis                |
| Messori A      | 2013 | Thromb Haemost                 |
| Mills EJ       | 2013 | BMJ                            |
| Seftel A       | 2013 | J Urol                         |
| Senn S         | 2013 | Stat Methods Med Res           |

|                |      |                         |
|----------------|------|-------------------------|
| Spineli LM     | 2013 | Clin Trials             |
| Thorlund K     | 2013 | BMC Med Res Methodol    |
| Tricco AC      | 2013 | Syst Rev                |
| Tricco AC      | 2013 | Syst Rev                |
| Tricco AC      | 2013 | Syst Rev                |
| Tricco AC      | 2013 | Syst Rev                |
| Tricco AC      | 2013 | Syst Rev                |
| Zaccara G      | 2013 | Br J Clin Pharmacol     |
| Arnold M       | 2012 | BMC Genomics            |
| Catalá-López F | 2012 | Diabetologia            |
| Cipriani A     | 2012 | Epidemiol Psychiatr Sci |
| Donegan S      | 2012 | Stat Med                |
| Griebeler M    | 2012 | Syst Rev                |
| Jansen JP      | 2012 | BMC Med Res Methodol    |
| Mills EJ       | 2012 | JAMA                    |
| Prutsky GJ     | 2012 | Syst Rev                |
| Schulman S     | 2012 | Thromb Haemost          |
| Thorlund K     | 2012 | Syst Rev                |
| Thorlund K     | 2012 | Clin Epidemiol          |
| Tricco AC      | 2012 | Syst Rev                |
| Tricco AC      | 2012 | Syst Rev                |
| Trinquart L    | 2012 | PLoS One                |
| Tu YK          | 2012 | ISRN Dent               |
| Ades AE        | 2011 | Value Health            |
| Elliott WJ     | 2011 | Arch Intern Med         |
| Fadda V        | 2011 | Br J Ophthalmol         |
| Fadda V        | 2011 | BMJ                     |
| Hoaglin DC     | 2011 | Value Health            |
| Jansen JP      | 2011 | Value Health            |
| Jansen JP      | 2011 | BMC Med Res Methodol    |
| Jones B        | 2011 | Pharm Stat              |
| Li T           | 2011 | BMC Med                 |
| Messori A      | 2011 | Aliment Pharmacol Ther  |
| Passaro D      | 2011 | Int J Cardiol           |
| Salanti G      | 2011 | J Clin Epidemiol        |
| Vignes M       | 2011 | PLoS One                |
| Ades AE        | 2010 | Value Health            |

|                |      |                                 |
|----------------|------|---------------------------------|
| Dias S         | 2010 | Stat Med                        |
| Edwards SJ     | 2010 | Value Health                    |
| Kumar A        | 2010 | Haematologica                   |
| Woods BS       | 2010 | BMC Med Res Methodol            |
| Giralt S       | 2009 | J Natl Cancer Inst              |
| Mehta J        | 2009 | J Natl Cancer Inst              |
| O'Regan C      | 2009 | Trials                          |
| Tricot G       | 2009 | J Natl Cancer Inst              |
| Baumgartner RW | 2008 | Eur Heart J                     |
| Chung H        | 2008 | Clin Trials                     |
| Jansen JP      | 2008 | Value Health                    |
| Lam SK         | 2008 | Eur Heart J                     |
| Caldwell DM    | 2007 | Lancet                          |
| Cipriani A     | 2007 | Lancet                          |
| Lu G           | 2007 | Stat Med                        |
| McAlister FA   | 2007 | Nat Clin Pract Endocrinol Metab |
| Pocock SJ      | 2007 | Lancet                          |
| Ballesteros J  | 2005 | J Clin Psychopharmacol          |
| Lumley T       | 2002 | Stat Med                        |
| Bucher HC      | 1997 | J Clin Epidemiol                |

**TABLE S2** - Descriptive characteristics of the 71 networks meta-analysis published in MEDLINE/ PubMed (update April 15<sup>th</sup>, 2014) with at least four treatments, two closed loop and dichotomous primary outcome.

| Author                        | Year | Journal                       | PubMed ID | Number of treatments | Number of studies | Clinical indications                                              | Type of interventions included |
|-------------------------------|------|-------------------------------|-----------|----------------------|-------------------|-------------------------------------------------------------------|--------------------------------|
| <b>Cardiovascular setting</b> |      |                               |           |                      |                   |                                                                   |                                |
| Dogliotti A                   | 2014 | Heart                         | 24009224  | 8                    | 20                | Non-valvular atrial fibrillation                                  | Oral antithrombotics           |
| Kang SH                       | 2014 | Eur Heart J                   | 24459196  | 8                    | 113               | Coronary revascularization                                        | Stents                         |
| Palmerini T                   | 2014 | J Am Coll Cardiol             | 24211507  | 8                    | 89                | Revascularization                                                 | Stents                         |
| Assiri A                      | 2013 | Clin Ther                     | 23870607  | 9                    | 21                | Non-valvular atrial fibrillation                                  | Antithrombotic drugs           |
| Bangalore S                   | 2013 | BMJ                           | 24212107  | 8                    | 126               | Coronary artery disease                                           | Stents                         |
| Chatterjee S                  | 2013 | BMJ                           | 23325883  | 6                    | 21                | Heart failure and reduced ejection fraction                       | Beta blockers                  |
| Landoni G                     | 2013 | Br J Anaesth                  | 23852263  | 4                    | 38                | Cardiac surgery                                                   | Anesthetic drugs               |
| Naci H                        | 2013 | Eur J Prev Cardiol            | 23447425  | 7                    | 92                | Coronary heart disease                                            | Stents                         |
| Naci H                        | 2013 | Circ Cardiovasc Qual Outcomes | 23838105  | 8                    | 135               | Cardiovascular disease                                            | Statins                        |
| Naci H                        | 2013 | QJM                           | 23431221  | 7                    | 61                | Major cerebrovascular disease                                     | Stents                         |
| Navarese EP                   | 2013 | BMJ                           | 24196498  | 6                    | 60                | Coronary artery disease or acute coronary syndrome                | Stents                         |
| Palmerini T                   | 2013 | J Am Coll Cardiol             | 23747778  | 5                    | 22                | ST-segment elevation myocardial infarction                        | Stents                         |
| Ribeiro RA                    | 2013 | Int J Cardiol                 | 22192281  | 4                    | 47                | Cardiovascular disease                                            | Statins                        |
| Stegeman BH                   | 2013 | BMJ                           | 24030561  | 14                   | 23                | Venous thrombosis                                                 | Generation of progestogen      |
| Alberton M                    | 2012 | QJM                           | 21920996  | 7                    | 72                | Cardiovascular disease                                            | Statins                        |
| Cohen A                       | 2012 | Clin Appl Thromb Hemost       | 22387582  | 5                    | 43                | Venous thromboembolism following elective knee or hip replacement | Pharmacological prophylaxis    |
| Fretheim A                    | 2012 | BMC Med                       | 22480336  | 9                    | 25                | Cardiovascular disease                                            | Antihypertensive drugs         |
| Hutton B                      | 2012 | BMJ                           | 22968722  | 4                    | 106               | Cardiac surgery using cardiopulmonary bypass                      | Antifibrinolytic drugs         |

|                                              |      |                            |          |    |     |                                                                                  |                                                   |
|----------------------------------------------|------|----------------------------|----------|----|-----|----------------------------------------------------------------------------------|---------------------------------------------------|
| Palmerini T                                  | 2012 | Lancet                     | 22445239 | 7  | 49  | Thrombosis                                                                       | Stents                                            |
| Sciarretta S                                 | 2011 | Arch Intern Med            | 21059964 | 9  | 26  | Hypertension                                                                     | Antihypertensive drugs                            |
| Owen A                                       | 2010 | Int J Cardiol              | 20061035 | 4  | 14  | Non-valvular atrial fibrillation                                                 | Antithrombotics                                   |
| Thijs V                                      | 2008 | Eur Heart J                | 18349026 | 5  | 24  | Prevention of serious vascular events after transient ischaemic attack or stroke | Antiplatelet drugs                                |
| Elliott WJ                                   | 2007 | Lancet                     | 17240286 | 6  | 22  | Hypertension (impaired glucose tolerance, insulin resistance, and obesity)       | Antihypertensive drugs                            |
| Psaty BM                                     | 2003 | JAMA                       | 12759325 | 7  | 42  | Hypertension                                                                     | Antihypertensive drugs                            |
| <b>Endocrinology and metabolic disorders</b> |      |                            |          |    |     |                                                                                  |                                                   |
| Tadrous M                                    | 2014 | Osteoporos Int             | 24287510 | 5  | 50  | Osteoporosis                                                                     | Bisphosphonates                                   |
| Rudroju N                                    | 2013 | Pain Physician             | 24284851 | 6  | 21  | Painful diabetic neuropathy                                                      | Antidepressant and anticonvulsant drugs           |
| Wu HY                                        | 2013 | BMJ                        | 24157497 | 11 | 63  | Diabetes                                                                         | Antihypertensive drugs                            |
| Dunkley AJ                                   | 2012 | Diabetes Obes Metab        | 22284386 | 4  | 13  | Metabolic syndrome                                                               | Pharmacological treatments and lifestyle regimens |
| Liu SC                                       | 2012 | Diabetes Obes Metab        | 22486990 | 9  | 39  | Type 2 diabetes mellitus                                                         | Antidiabetic drugs                                |
| Murad MH                                     | 2012 | J Clin Endocrinol Metab    | 22466336 | 10 | 116 | Fragility fractures prevention                                                   | Pharmacological agents                            |
| Sun F                                        | 2012 | Diabetes Res Clin Pract    | 23020934 | 8  | 45  | Type 2 diabetes mellitus                                                         | Glucagon-like peptide-1 agonists                  |
| Sun F                                        | 2012 | Exp Diabetes Res           | 23365557 | 8  | 35  | Type 2 diabetes mellitus                                                         | Glucagon-like peptide-1 agonists                  |
| Padwal R                                     | 2011 | Obes Rev                   | 21438991 | 9  | 31  | Obesity                                                                          | Bariatric surgeries and/or standard care          |
| <b>Neurology</b>                             |      |                            |          |    |     |                                                                                  |                                                   |
| Yang B                                       | 2014 | PLoS One                   | 24551100 | 6  | 145 | Acute cerebral stroke                                                            | Treatments of acute cerebral stroke               |
| Bodalia PN                                   | 2013 | Br J Clin Pharmacol        | 23351090 | 12 | 43  | Refractory focal epilepsy                                                        | Antiepileptic drugs                               |
| Filippini G                                  | 2013 | Cochrane Database Syst Rev | 23744561 | 10 | 44  | Multiple sclerosis                                                               | Immunomodulators and immunosuppressants           |
| Levi Marpillat N                             | 2013 | J Hypertens                | 23552124 | 6  | 17  | Cognitive decline and dementia                                                   | Antihypertensive drugs                            |
| Malloy RJ                                    | 2013 | Clin Ther                  | 24139421 | 11 | 24  | Stroke                                                                           | Antiplatelet drugs                                |
| Thorlund K                                   | 2013 | Cephalalgia                | 24108308 | 8  | 74  | Migraine                                                                         | Triptans                                          |

| <b>Pschiatry</b>              |      |                                 |          |    |     |                                               |                                                                                     |
|-------------------------------|------|---------------------------------|----------|----|-----|-----------------------------------------------|-------------------------------------------------------------------------------------|
| Reichenpfader U               | 2014 | Drug Saf                        | 24338044 | 17 | 37  | Major depressive disorder                     | Second-generation antidepressants                                                   |
| Leucht S                      | 2013 | Lancet                          | 23810019 | 15 | 212 | Schizophrenia                                 | Antipsychotic drugs                                                                 |
| Ramsberg J                    | 2012 | PLoS One                        | 22876296 | 17 | 87  | Major depressive disorder                     | Antidepressant drugs                                                                |
| van Valkenhoef G              | 2012 | J Clin Epidemiol                | 22197518 | 5  | 25  | Depression                                    | Second-generation antidepressants                                                   |
| Cipriani A                    | 2011 | Lancet                          | 21851976 | 14 | 68  | Acute mania                                   | Antimanic drugs                                                                     |
| Cipriani A                    | 2009 | Lancet                          | 19185342 | 12 | 117 | Unipolar major depression                     | Antidepressant drugs                                                                |
| <b>Pulmonology</b>            |      |                                 |          |    |     |                                               |                                                                                     |
| Cope S                        | 2013 | Respir Res                      | 24093477 | 10 | 40  | Chronic obstructive pulmonary disease         | Long-acting bronchodilators                                                         |
| Dong YH                       | 2013 | Thorax                          | 23042705 | 6  | 42  | Chronic obstructive pulmonary disease         | Inhaled medications                                                                 |
| Karabis A                     | 2013 | Int J Chron Obstruct Pulmon Dis | 24043936 | 5  | 21  | Chronic obstructive pulmonary disease         | Antimuscarinic bronchodilators                                                      |
| Mills EJ                      | 2011 | Clin Epidemiol                  | 21487451 | 10 | 26  | Chronic obstructive pulmonary disease         | Pharmacotherapies for chronic obstructive pulmonary disease                         |
| Baker WL                      | 2009 | Pharmacotherapy                 | 19637942 | 8  | 43  | Chronic obstructive pulmonary disease         | Long-acting beta(2)-agonists and inhaled corticosteroids                            |
| Puhan MA                      | 2009 | BMC Med                         | 19144173 | 4  | 35  | Chronic obstructive pulmonary disease         | Long-acting beta-agonists, long-acting anticholinergics and inhaled corticosteroids |
| <b>Gastrointestinal tract</b> |      |                                 |          |    |     |                                               |                                                                                     |
| Li L                          | 2014 | PLoS One                        | 24587319 | 5  | 43  | Benign gallbladder disease                    | Laparoscopies                                                                       |
| Li LT                         | 2014 | Colorectal Dis                  | 24422861 | 6  | 15  | Enterostomy (ileostomy or colostomy) reversal | Skin closure techniques                                                             |
| Akshintala VS                 | 2013 | Aliment Pharmacol Ther          | 24138390 | 16 | 99  | Retrograde cholangio-pancreatography          | Pharmacological prophylaxis                                                         |
| Shi KQ                        | 2013 | Eur J Clin Invest               | 23725530 | 12 | 51  | Oesophageal varices                           | Interventions for secondary prophylaxis of variceal bleeding                        |
| Tang DH                       | 2012 | Clin Ther                       | 22296947 | 4  | 85  | Postoperative nausea and vomiting             | Serotonin type 3 receptor antagonists                                               |
| <b>Oncology</b>               |      |                                 |          |    |     |                                               |                                                                                     |
| Terasawa T                    | 2013 | Cancer Treat Rev                | 22703832 | 12 | 30  | Advanced-stage chronic lymphocytic leukemia   | First-line therapies for advanced-stage chronic lymphocytic leukemia                |

|                      |      |                            |          |     |     |                                                      |                                                                                  |
|----------------------|------|----------------------------|----------|-----|-----|------------------------------------------------------|----------------------------------------------------------------------------------|
| Blanchard P          | 2011 | J Clin Epidemiol           | 21330105 | 6   | 102 | Head and neck cancers                                | Fractionated radiotherapies and chemotherapies                                   |
| Mauri D              | 2008 | J Natl Cancer Inst         | 19066278 | 22  | 172 | Creast cancer                                        | Chemotherapy regimens                                                            |
| Kyrgiou M            | 2007 | J Natl Cancer Inst         | 17105988 | 120 | 198 | Ovarian Cancer                                       | Chemotherapy regimens                                                            |
| <b>Immune system</b> |      |                            |          |     |     |                                                      |                                                                                  |
| Reich K              | 2012 | Br J Dermatol              | 21910698 | 8   | 20  | Moderate to severe psoriasis                         | Biologic therapies                                                               |
| Singh JA             | 2011 | Cochrane Database Syst Rev | 21328309 | 9   | 163 | Rheumatoid arthritis                                 | Biologic therapies                                                               |
| <b>Infections</b>    |      |                            |          |     |     |                                                      |                                                                                  |
| Rotta I              | 2013 | JAMA Dermatol              | 23553036 | 14  | 65  | Dermatophytosis                                      | Topical Antifungals                                                              |
| Wang H               | 2010 | J Hosp Infect              | 20638155 | 10  | 48  | Nosocomial infection                                 | Central venous catheteres                                                        |
| <b>Smoke</b>         |      |                            |          |     |     |                                                      |                                                                                  |
| Cahill K             | 2013 | Cochrane Database Syst Rev | 23728690 | 12  | 267 | Smoking cessation                                    | First-line pharmacotherapies                                                     |
| Cooper NJ            | 2012 | Epidemiol Rev              | 22128085 | 7   | 20  | Smoke alarms in households with children             | Interventions to increase the uptake of smoke alarms in households with children |
| <b>Other</b>         |      |                            |          |     |     |                                                      |                                                                                  |
| Buti J               | 2013 | J Clin Periodontol         | 23346965 | 7   | 31  | Coronally advanced flap                              | Root coverage procedures                                                         |
| Lin PY               | 2014 | J Dent                     | 24513112 | 5   | 22  | Pulpitis in primary molars                           | Pulpotomy techniques                                                             |
| Gupta AK             | 2013 | Br J Dermatol              | 23550994 | 8   | 36  | Actinic keratosis (nonimmunosuppressed participants) | Interventions for actinic keratosis                                              |
| Haas DM              | 2012 | BMJ                        | 23048010 | 6   | 95  | Preterm delivery                                     | Tocolytics                                                                       |
| Trelle S             | 2011 | BMJ                        | 21224324 | 8   | 31  | Any medical condition                                | Non-steroidal anti-inflammatory drugs                                            |

**Cite this article as:** Greco T, Biondi-Zoccai G, Saleh O, Pasin L, Cabrini L, Zangrillo A, Landoni G. The attractiveness of network meta-analysis: a comprehensive systematic and narrative review. *Heart, Lung and Vessels*. 2015; 7(2): 133-142.

**Source of Support:** Nil. **Disclosures:** None declared.

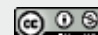

Supplement: hlv-07-133-s001.pdf [file hlv-07-133-s001.pdf]
